# Supplementary material for: Effects of calcium on cell wall metabolism enzymes and expression of related genes associated with peel creasing in Citrus fruits
Source: PeerJ. 2022 Dec 20;10:e14574. doi: 10.7717/peerj.14574 (PMC9784343; doi:10.7717/peerj.14574)
Supplement: Supplemental Information 1 [file peerj-10-14574-s001.xlsx]

## Sheet: creasing rate
	Accumulative fruit creasing rate of ‘Hongjiang’ oranges in 2014.
Accumulative fruit creasing rate (%)
		8-15	9-15	10-15	11-15	12-01
		0.343643	0.343643	1.71821	6.87285	7.90378
		0	0	1.47059	3.92157	5.88235
		0	0.314465	0.943396	8.80503	11.3208
		0	0	0.810811	7.2973	7.83784
		0	0	2.6738	13.369	14.9733
	Means	0.0687285	0.131622	1.52336	8.05315	9.5836
	SE	0.0687285	0.0807334	0.332291	1.5469	1.60678
Effects of different treatments on fruit creasing rate of ‘Hongjiang’ oranges (2014 and 2015）
2014								2015
Treatments		Ca（NO3）2	LaCl3	EGTA	TFP	CK			Ca（NO3）2	LaCl3	EGTA	TFP	CK
%		6.29213	12.1339	10.6918	10.0559	7.90378			3.6036	16.25	12.8676	10.5528	9.09091
		6.40741	14.6341	13.9964	10.2389	9.02075			4.58015	17.3913	12.4555	12.3348	9.31677
		6.6087	15.4362	13.1148	10.4235	7.83784			6.48855	16.82	12.3529	6.12245	9.89399
Means		6.43608	14.0681	12.601	10.2394	8.25412		均值	4.89077	16.8204	12.5587	9.67	9.43389
Standard error		0.0925009	0.994433	0.987934	0.106113	0.383788		标准误	0.691711	0.269008	0.128423	1.50796	0.195234
Significance (t-test)
		*	**	*	**				**	**	**	ns
		t-test, * and ** indicate significant differences between the treatment and the contral at P ≤ 0.05 and P ≤ 0.01, respectively, the same below.

## Sheet: peel thickness and hardness
Comparison of thickness and hardness of fruit peels between exposed fruits and shaded fruits of ‘Hongjiang’ orange
		Peel thickness(mm)										Peel hardness(N)
Year	2014									Year	2014
	Date		8-15	9-15	10-15	11-15	12-01				Date	8-15	9-15	10-15	11-15	12-01
Exposed fruit										Exposed fruit
			3.856	3.04	2.549	2.93	2.695					22.8517	15.3985	13.5357	11.0988	10.7337
			3.816	3.296	2.476	2.72833	3.2325					23.9299	15.6612	15.6616	12.227	9.55581
			4.144	3.02	2.40467	2.83	3.0425					23.5087	15.8292	13.5809	12.1647	10.0126
	Means		3.93867	3.11867	2.47656	2.82944	2.99				Means	23.4301	15.6296	14.2594	11.8302	10.1007
	SE		0.103314	0.0888544	0.0416664	0.0582168	0.157368				SE	0.313729	0.12532	0.701225	0.366132	0.342863
										Shaded fruit
Shaded fruit			3.562	2.48	2.136	2.685	2.98875					23.4553	15.3819	12.5866	10.5699	10.3502
			3.572	2.4925	1.9	2.4575	2.44					21.5897	14.4702	18.7846	12.2398	10.8523
			3.594	2.488	1.965	2.565	2.44625					23.4897	15.3599	16.3002	9.83935	10.0506
	Means		3.576	2.48683	2.00033	2.56917	2.625				Means	22.8449	15.0707	15.8904	10.883	10.4177
	SE		0.00945163	0.00365529	0.0703807	0.0657066	0.181884				SE	0.627672	0.300314	1.8009	0.71041	0.233886
Significance(t-test)			ns	**	**	*	ns
									Significance(t-test)			ns	ns	ns	ns	ns
	Effects of calcium and calcium inhibitor treatments on fruit peel thickness and hardness in ‘Hongjiang’ oranges
	Peel thickness (mm)									Peel hardness (N)
		8-15	9-15	10-15	11-15	12-01					8-15	9-15	10-15	11-15	12-01
Means	Ca(NO3)2	3.84033	2.5744	2.2	2.74625	2.57975			Means	Ca(NO3)2	21.41	18.6037	13.6857	10.0856	11.1804
	LaCl3	3.25933	2.46133	1.80178	2.55525	2.3535				LaCl3	23.11	14.8518	14.5161	10.2126	10.5042
	EGTA	3.22033	2.3436	2.0602	2.34825	2.4445				EGTA	22.54	14.3752	14.5295	10.9377	11.0189
	TFP	3.213	2.3308	1.94712	2.56675	2.518				TFP	21.57	15.2742	14.5471	11.3238	9.62978
	CK	3.54333	2.4869	2.0464	2.57375	2.65075				CK	23.62	16.0255	15.89	11.3713	10.5331
SE	Ca(NO3)2	0.0867793	0.0961528	0.129231	0.062425	0.0487282			SE	Ca(NO3)2	1.42131	0.739073	0.507258	0.407655	0.769713
	LaCl3	0.0770517	0.0766901	0.0569727	0.0344905	0.0288515				LaCl3	1.28646	0.770019	0.176285	0.40195	0.691706
	EGTA	0.0797561	0.0903845	0.0873965	0.0510202	0.0398662				EGTA	1.16401	0.283327	0.690463	0.443097	0.239782
	TFP	0.0924865	0.0286119	0.0836192	0.141477	0.107227				TFP	0.642943	0.674553	1.04096	0.379508	0.811604
	CK	0.0405739	0.0313705	0.0827047	0.0600807	0.170734				CK	0.899934	0.607818	1.37327	0.700449	0.738738
Significance (Duncan multiple comparisons)								Significance (Duncan multiple comparisons)
		8-15	9-15	10-15	11-15	12-01					8-15	9-15	10-15	11-15	12-01
	Ca(NO3)2	a	a	a	a	a				Ca(NO3)2	a	a	b	a	a
	LaCl3	c	ab	b	ab	a				LaCl3	a	b	b	a	a
	EGTA	c	b	ab	b	a				EGTA	a	b	b	a	a
	TFP	c	b	ab	ab	a				TFP	a	b	b	a	a
	CK	b	ab	ab	ab	a				CK	a	b	a	a	a
	Different letters indicate a significant difference between treatments at P≤0.05

## Sheet: enzyme activity
Effects of calcium and calcium inhibitor treatments on activities of cell wall metabolic enzymes in ‘Hongjiang’ orange peel
	Cellulase activity(Cx)								Polygalacturonase（PG）									Pectinesterase（PE）
8-15	Ca（NO3）2	LaCl3	EGTA	TFP	CK				8-15	Ca（NO3）2	LaCl3	EGTA	TFP	CK				8-15	Ca（NO3）2	LaCl3	EGTA	TFP	CK
	32.801	31.7571	31.9685	22.1338	29.8124					9.59819	11.6864	10.3364	11.4191	10.3384					28.8321	34.6084	28.7253	26.9165	31.6759
	28.5484	28.3594	28.3833	34.9479	27.8932					9.29667	11.0252	10.6962	10.5754	11.2377					35.3357	31.1891	29.9065	29.7248	27.7778
	31.2012	30.9913	23.4029	35.2611	25.3713					7.79011	10.0026	10.7058	9.75326	9.77015					27.8388	31.0078	27.5728	26.8714	28.3688
Means	30.8502	30.3693	27.9182	30.781	27.6923				Means	8.89499	10.9047	10.5795	10.5826	10.4487				Means	30.6689	32.2684	28.7349	27.8376	29.2741
SE	1.2401	1.02895	2.48358	4.32451	1.28596				SE	0.559257	0.489796	0.12158	0.480898	0.427209				SE	2.35096	1.17116	0.673706	0.943692	1.21292
9-15	Ca（NO3）2	LaCl3	EGTA	TFP	CK				9-15	Ca（NO3）2	LaCl3	EGTA	TFP	CK				9-15	Ca（NO3）2	LaCl3	EGTA	TFP	CK
	33.7117	36.7734	37.4942	43.0072	33.9988					22.89	23.4396	21.2041	24.2493	19.1797					30.6011	33.0241	34.0502	33.5175	37.1058
	26.5699	45.6642	38.9315	44.2661	34.5857					19.4665	23.4154	22.2448	24.8611	20.7307					30.7978	37.4291	30.1811	34.358	36.2319
	33.8831	36.0542	41.0051	45.5638	35.5476					21.5722	21.5121	22.2474	24.1715	20.4666					32.2222	33.2103	33.5849	33.0275	30.2368
Means	31.3882	39.4973	39.1436	44.279	34.7107				Means	21.3096	22.789	21.8987	24.4273	20.1257				Means	31.207	34.5545	32.6054	33.6344	34.5248
SE	2.40966	3.09044	1.01906	0.738049	0.451433				SE	0.996956	0.638497	0.347317	0.218059	0.479111				SE	0.510762	1.4383	1.21957	0.388508	2.1588
10-15	Ca（NO3）2	LaCl3	EGTA	TFP	CK				10-15	Ca（NO3）2	LaCl3	EGTA	TFP	CK				10-15	Ca（NO3）2	LaCl3	EGTA	TFP	CK
	56.5566	54.796	57.9123	56.4781	55.4433					27.8205	34.5695	27.8399	28.5947	27.4483					37.4074	38.7097	43.2	37.0937	32.1361
	61.2104	68.8921	55.0579	68.8146	53.5324					36.0929	33.1003	26.3188	35.5773	25.8205					36.6089	37.7649	36.5942	35.9926	32.7138
	47.5074	53.8804	63.9194	56.3991	51.4255					33.7333	29.9844	32.1596	30.0875	26.0255					33.3996	37.3333	38.7476	38.9864	41.8605
Means	55.0915	59.1895	58.9632	60.5639	53.4671				Means	32.5489	32.5514	28.7728	31.4198	26.4314				Means	35.8053	37.936	39.5139	37.3575	35.5701
SE	4.02296	4.8585	2.61149	4.12539	1.16032				SE	2.46036	1.35174	1.74942	2.12292	0.511856				SE	1.22473	0.406417	1.94505	0.87424	3.1496
11-15	Ca（NO3）2	LaCl3	EGTA	TFP	CK				11-15	Ca（NO3）2	LaCl3	EGTA	TFP	CK				11-15	Ca（NO3）2	LaCl3	EGTA	TFP	CK
	45.382	57.6997	70.2611	59.5746	55.533					51.486	61.2695	57.8563	62.813	55.9174					28.131	44.3137	36.0845	33.3996	29.8211
	35.9044	66.2985	69.1712	75.3922	60.6696					51.8107	46.348	58.8002	54.2398	57.1833					34.6863	36.4683	38.6973	30.9392	33.3952
	42.2649	67.1201	58.6343	79.3111	51.8421					57.798	61.9431	58.3614	56.1287	56.9453					33.2046	37.1094	38.0228	34.3511	29.4118
Means	41.1838	63.7061	66.0222	71.426	56.0149				Means	53.6982	56.5202	58.3393	57.7272	56.682				Means	32.0073	39.2971	37.6015	32.8967	30.876
SE	2.78885	3.01257	3.70732	6.0327	2.55963				SE	2.05202	5.08983	0.272721	2.60072	0.388422				SE	1.98479	2.51511	0.78313	1.01653	1.26512
12-01	Ca（NO3）2	LaCl3	EGTA	TFP	CK				12-01	Ca（NO3）2	LaCl3	EGTA	TFP	CK				12-01	Ca（NO3）2	LaCl3	EGTA	TFP	CK
	80.0808	94.7643	89.0436	100.386	85.5052					54.3763	59.6444	61.523	66.08	52.2489					27.2	28.8	30.08	33.6	28.48
	82.8828	95.6893	92.7077	101.796	79.057					55.5081	60.2074	63.9644	58.7556	58.1867					24.32	26.88	28.8	31.04	25.6
	77.8177	93.0759	81.1855	91.4683	81.1585					53.7837	59.2356	57.203	66.4119	50.4237					27.52	25.6	32	28.8	28.48
Means	80.2604	94.5098	87.6456	97.8836	81.9069				Means	54.556	59.6958	60.8968	63.7491	53.6198				Means	26.3467	27.0933	30.2933	31.1467	27.52
SE	1.46493	0.765071	3.39883	3.23332	1.89866				SE	0.505853	0.281722	1.97682	2.49863	2.34346				SE	1.01754	0.929898	0.929898	1.38667	0.96
Significance (Duncan multiple comparisons)									Significance (Duncan multiple comparisons)									Significance (Duncan multiple comparisons)
Treatment	8-15	9-15	10-15	11-15	12-01				Treatment	8-15	9-15	10-15	11-15	12-01				Treatment	8-15	9-15	10-15	11-15	12-01
Ca(NO3)2	a	c	a	c	c				Ca(NO3)2	b	bc	a	a	bc				Ca(NO3)2	a	a	a	c	c
LaCl3	a	ab	a	ab	ab				LaCl3	a	ab	a	a	ab				LaCl3	a	a	a	a	bc
EGTA	a	ab	a	ab	bc				EGTA	a	bc	ab	a	a				EGTA	a	a	a	ab	ab
TFP	a	a	a	a	a				TFP	a	a	ab	a	a				TFP	a	a	a	bc	a
CK	a	bc	a	b	c				CK	a	c	b	a	c				CK	a	a	a	c	bc

## Sheet: gene expression
Comparison of gene expression of metabolizing enzymes between normal fruit peel and creasing fruit peel in 2014
CX	Normal fruit	creasing fruit			PG	Normal fruit	creasing fruit		PE	Normal fruit	creasing fruit
	1	2.07874				0.325893	0.771719			0.0933325	0.371139
	1.09619	1.52687				0.408197	0.793738			0.175419	0.820216
	0.88994	2.10833				0.175781	1.55876			0.111139	0.500598
Means	0.995377	1.90465			Means	0.30329	1.04141		Means	0.12663	0.563985
SE	0.0595841	0.189081			SE	0.0680379	0.258755		SE	0.0305331	0.163449
significance	**					*				*
Comparison of the expression of Cx, PE, and PG between shaded fruit peel and exposed fruit peel in 2014
Exposed fruit	10-15	11-15	12-01	PE	10-15	11-15	12-01	PG	10-15	11-15	12-01
Cx	0.85071	0.88482	0.96208		0.50934	0.78209	0.87914		0.49317	1.16056	0.65444
	1.08936	0.90363	1		0.34136	0.89268	0.25246		0.53008	0.98713	0.77374
	0.78447	0.96607	0.99824		0.66764	0.4705	0.68642		0.6934	0.69976	1.09673
Means	0.90818	0.918173	0.986773		0.506113	0.71509	0.606007		0.572217	0.94915	0.841637
SE	0.0925861	0.0245562	0.0123571		0.0942027	0.126393	0.185321		0.0615214	0.13437	0.132114
Shaded fruit	10-15	11-15	12-01	PE	10-15	11-15	12-01	PG	10-15	11-15	12-01
Cx	1.24564	1.10271	0.57887		1.2031	2.09093	0.66869		1.36422	2.33934	0.5073
	1.19467	1.02181	0.28549		1.58461	1.09209	0.64595		1.29272	1.38669	0.47582
	1.64297	1	0.36446		1.65463	1	0.69154		1.65463	1	0.6314
Means	1.36109	1.04151	0.409607		1.48078	1.39434	0.668727		1.43719	1.57534	0.538173
SE	0.141704	0.0312426	0.0876482		0.140304	0.349308	0.0131607		0.110662	0.397974	0.0474909
significance	ns	*	**		**	ns	ns		**	ns	ns
Effects of different treatments on the expression of PE, Cx, and PG in ‘Hongjiang’ orange peel in 2014
CX						PE					PG
Ca（NO3）2	10-15	11-15	12-01		Ca（NO3）2	10-15	11-15	12-01		Ca（NO3）2	10-15	11-15	12-01
	0.61995	0.53732	0.58925			0.73376	0.68226	1.35			0.84487	0.62702	0.39923
	0.67416	0.71894	0.56002			0.49749	0.99181	1.43332			0.59528	0.83272	0.84839
	0.75157	0.73913	0.64187			0.67254	0.42164	1.19169			0.92562	1	0.74589
Means	0.681893	0.66513	0.597047		Means	0.634597	0.69857	1.325		Means	0.78859	0.819913	0.664503
SE	0.0381917	0.0641702	0.0239475		SE	0.0707947	0.164796	0.0708635		SE	0.0994262	0.10786	0.135897
LaCl3	10-15	11-15	12-01		LaCl3	10-15	11-15	12-01		LaCl3	10-15	11-15	12-01
	1.11607	1.32526	1.19333			1.57806	1.02887	1.16497			1.76643	1.39365	0.35831
	1.32151	1.39561	1.1279			1.2092	1.01425	1.07417			1.14822	1.85794	0.42357
	1.13543	1.25078	0.80517			1.33712	1.56948	1.60851			1.01827	2.12203	0.6395
Means	1.191	1.32388	1.04213		Means	1.37479	1.2042	1.28255		Means	1.31097	1.79121	0.473793
SE	0.0654922	0.0418145	0.119978		SE	0.108134	0.182689	0.165074		SE	0.230797	0.212896	0.0849681
EGTA	10-15	11-15	12-01		EGTA	10-15	11-15	12-01		EGTA	10-15	11-15	12-01
	1.5353		1.44989			2.94066	4.7976	1.58764			2.27088	7.00908	1.47231
	1.12221	1.56184	1.53768			1.91428	5.40339	3.45403			1.87268	5.70207	1.20155
	1.6431	1.3658	1.28609			2.47	5.2	2.44772			3.00955	6.4025	2.55941
Means	1.43354	1.46382	1.42455		Means	2.44165	5.13366	2.49646		Means	2.38437	6.37122	1.74442
SE	0.158743	0.080033	0.0737244		SE	0.296629	0.177994	0.539331		SE	0.333056	0.377625	0.414922
TFP	10-15	11-15	12-01		TFP	10-15	11-15	12-01		TFP	10-15	11-15	12-01
	1	1.15181	1			1.68615	0.81905	0.4462			2.51885	1.08192	0.63415
	0.64564	1.53773	1			1.66298	1.67038	0.36216			3.60486	3.34053	0.69436
	0.8325	1.3524	1.1025			1.67025	1.25	0.35809			3.1025	2.342	0.80045
Means	0.826047	1.34731	1.03417		Means	1.67313	1.24648	0.388817		Means	3.0754	2.25482	0.709653
SE	0.102346	0.111435	0.0341667		SE	0.00684151	0.245764	0.0287157		SE	0.313797	0.65346	0.0486119
CK	10-15	11-15	12-01		CK	10-15	11-15	12-01		CK	10-15	11-15	12-01
	0.88678	1	1.0371			1.57936	1.89281	1.6992			1.64695	1.21688	1.19169
	0.80104	1.19909	1.25592			1.24588	1.80604	1.99285			1.07574	1.37299	1.38897
	0.85	1.1	1.02221			1.42357	1.26417	1.8564			1.92332	2.56161	1.82971
Means	0.84594	1.0997	1.10508		Means	1.41627	1.65434	1.84948		Means	1.54867	1.71716	1.47012
SE	0.0248341	0.0574725	0.0755441		SE	0.0963366	0.196686	0.08484		SE	0.249561	0.424623	0.188597
Significance (Duncan multiple comparisons)
	10-15	11-15	12-01			10-15	11-15	12-01			10-15	11-15	12-01
Ca（NO3）2	b	c	c		Ca（NO3）2	c	c	b		Ca（NO3）2	b	c	b
LaCl3	a	ab	b		LaCl3	b	bc	b		LaCl3	b	bc	b
EGTA	a	a	a		EGTA	a	a	a		EGTA	a	a	a
TFP	b	ab	b		TFP	b	bc	c		TFP	a	b	b
CK	b	b	b		CK	b	b	ab		CK	b	c	a
	Different letters indicate a significant difference between treatments at P≤0.05
